# Supplementary material
Source: Springer Nature journal article supplement (https://www.springermedizin.de/resource/supplementary/12887_2012_814_MOESM1_ESM.pdf/9476298)

25 (OH) D ng/mL

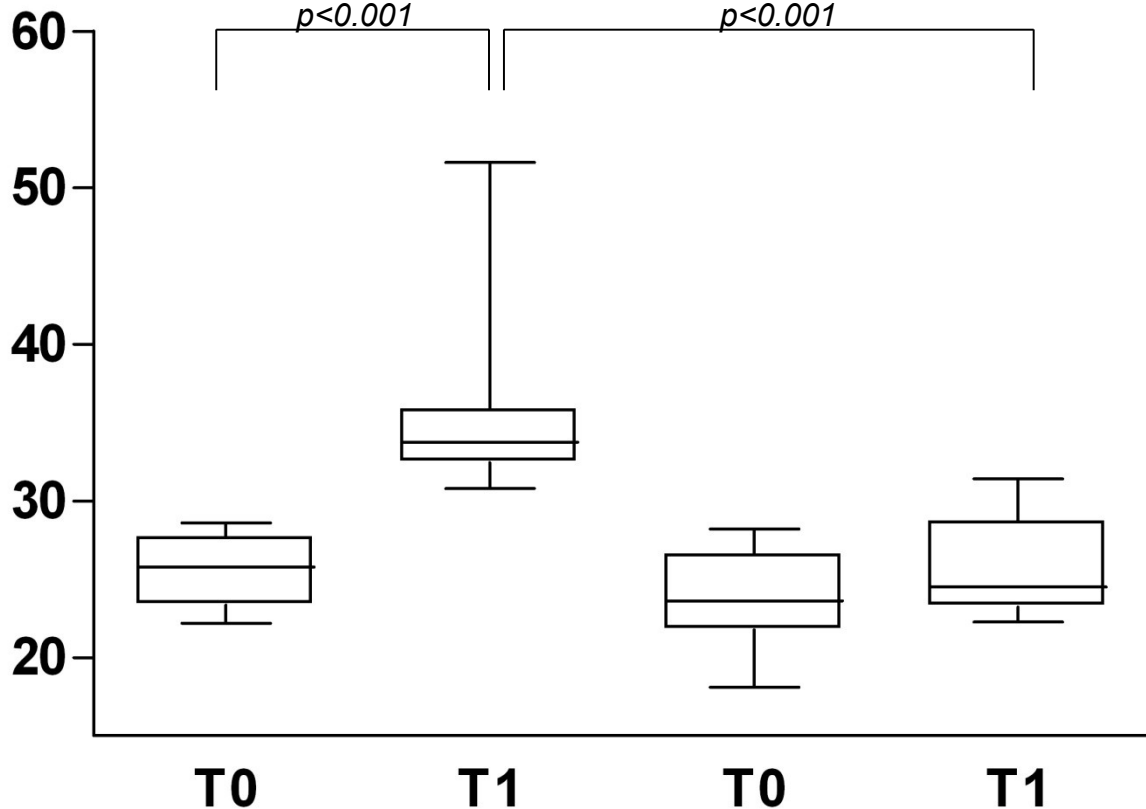

Supplement: MOESM1 [file 9476298]
